# Supplementary material for: COVID-19 induced acute respiratory distress syndrome treated with Hyperbaric Oxygen: Interim safety report from a multicenter, randomised, open-label phase II clinical trial (COVID-19-HBO)
Source: Research Square preprint supplement (doi:10.21203/rs.3.rs-1494203/v1), 2022-04-14
Supplement: Supplementary file 1 [file 43230856824aa44efca27dc9.xlsx]

## Sheet: Sheet1
Online resource 1.
Custom Tables
Table 1.1.1 Overview och Adverse Events
	Group
			Best practice		Hyperbaric oxygen (HBO)
	Count	Sum	Count	Sum	Count	Sum
AEFREQ	1	1	13	55	14	40
Custom Tables
Table 1.2.1 Summary of Adverse Events by System Organ Class and Preferred Term
		Group
			Best practice	Hyperbaric oxygen (HBO)
		Count	Count	Count
SOC
	Cardiac disorder	0	2	0
	Cardiac disorders	0	1	3
	Ear and labyrinth disorders	0	1	1
	General disorders and administration site conditions	0	0	1
	Infections and infestaions	0	1	0
	Infections and infestations	0	1	1
	Metabolism and nutrition disorders	0	2	0
	Nervous system disorders	0	0	1
	Psychiatric disorders	0	1	2
	Respiratory, thoracic and mediastinal disorders	0	3	4
	Vascular disorders	0	1	1
PT
	Abscess	0	1	0
	Anxiety	0	1	0
	Atrial fibrillation	0	2	0
	Bacteremia	0	1	0
	Bradycardia	0	1	0
	Cardiogenic Shock	0	0	1
	Chest pain	0	0	1
	Claustrophobia	0	0	1
	Cough	0	1	0
	Depression	0	0	1
	Diabetes mellitus	0	2	0
	Ear pain	0	1	1
	Fever	0	0	1
	Fungal infection	0	0	1
	Headache	0	0	1
	Hypotension	0	1	1
	Hypoxia	0	2	4
	Ventricular extrasystoles	0	0	1
Custom Tables
Table 1.3.1 Summary of Adverse Events by Severity, SOC and PT.
						Group
							Best practice	Hyperbaric oxygen (HBO)
						Count	Count	Count
Severity		SOC		PT
	Mild	SOC	Cardiac disorder	PT	Atrial fibrillation	0	1	0
			Cardiac disorders	PT	Bradycardia	0	1	0
					Chest pain	0	0	1
					Ventricular extrasystoles	0	0	1
			Ear and labyrinth disorders	PT	Ear pain	0	1	1
			General disorders and administration site conditions	PT	Fever	0	0	1
			Infections and infestations	PT	Abscess	0	1	0
					Fungal infection	0	0	1
			Metabolism and nutrition disorders	PT	Diabetes mellitus	0	2	0
			Nervous system disorders	PT	Headache	0	0	1
			Psychiatric disorders	PT	Claustrophobia	0	0	1
			Respiratory, thoracic and mediastinal disorders	PT	Cough	0	1	0
			Vascular disorders	PT	Hypotension	0	1	0
	Moderate	SOC	Cardiac disorder	PT	Atrial fibrillation	0	1	0
			Infections and infestaions	PT	Bacteremia	0	1	0
			Psychiatric disorders	PT	Anxiety	0	1	0
					Depression	0	0	1
			Respiratory, thoracic and mediastinal disorders	PT	Hypoxia	0	2	4
			Vascular disorders	PT	Hypotension	0	0	1
	Severe	SOC	Cardiac disorders	PT	Cardiogenic Shock	0	0	1
Custom Tables
Table 1.1.3 Overview of Serious Adverse Events
	Group
	Best practice		Hyperbaric oxygen (HBO)
	Count	Sum	Count	Sum
SAEFREQ	6	14	6	9
Custom Tables
Table 1.2.2 Summary of Serious Adverse Events by System Organ Class and Preferred Term
				Group
				Best practice	Hyperbaric oxygen (HBO)
				Count	Count
SOC	Cardiac disorders	PT	Cardiac arrest	1	0
			Cardiogenic Shock	0	1
	Infections and infestations	PT	Pneumonia	4	0
	Respiratory, thoracic and mediastinal disorders	PT	Hypoxia	7	7
			Pneumothorax	1	0
	Vascular disorders	PT	Hypotension	1	1
Custom Tables
Table 1.3.2 Summary of Serious Adverse Events by Severity, SOC and PT.
						Group
						Best practice	Hyperbaric oxygen (HBO)
						Count	Count
Severity	Mild	SOC	Infections and infestations	PT	Pneumonia	1	0
			Respiratory, thoracic and mediastinal disorders	PT	Hypoxia	0	1
					Pneumothorax	1	0
			Vascular disorders	PT	Hypotension	0	1
	Moderate	SOC	Infections and infestations	PT	Pneumonia	3	0
			Respiratory, thoracic and mediastinal disorders	PT	Hypoxia	6	3
	Severe	SOC	Cardiac disorders	PT	Cardiac arrest	1	0
					Cardiogenic Shock	0	1
			Respiratory, thoracic and mediastinal disorders	PT	Hypoxia	1	3
			Vascular disorders	PT	Hypotension	1	0
